# Supplementary material for: IgG Glycosylation Profile and the Glycan Score Are Associated with Type 2 Diabetes in Independent Chinese Populations: A Case-Control Study
Source: Hindawi journal article supplement (doi:10.1155/2020/5041346), 2020-06-09
Supplement: f1 [file 5041346.f1.pdf]

**Supplementary Table S1: The structures and descriptions of the IgG glycans.**

Structure abbreviations: F, core fucose; A, number of antenna's; B, bisecting GlcNAc; M, number of mannose residues; G<sub>x</sub>, number of galactoses; S<sub>x</sub>, number of sialic acids linked to galactose; n, neutral glycans.

|                    | Structure | Description                                                                                   |
|--------------------|-----------|-----------------------------------------------------------------------------------------------|
| <b>Glycan peak</b> |           |                                                                                               |
| GP1                | FA1       | monoantennary glycan with core fucose                                                         |
| GP2                | A2        | biantennary glycan                                                                            |
| GP3                | -         | structure not determined                                                                      |
| GP4                | FA2       | monoantennary glycan with core fucose                                                         |
| GP5                | M5        | high mannose glycan                                                                           |
| GP6                | FA2B      | biantennary glycan with bisecting GlcNAc and core fucose                                      |
| GP7                | A2G1      | monogalactosylated biantennary glycan                                                         |
| GP8                | FA2[6]G1  | monogalactosylated biantennary glycan with 1-6 linkages with core fucose                      |
| GP9                | FA2[3]G1  | monogalactosylated biantennary glycan with 1-3 linkages with core fucose                      |
| GP10               | FA2[6]BG1 | monogalactosylated biantennary glycan with 1-6 linkages with bisecting GlcNAc and core fucose |
| GP11               | FA2[3]BG1 | monogalactosylated biantennary glycan with 1-3 linkages with bisecting GlcNAc and core fucose |
| GP12               | A2G2      | digalactosylated biantennary glycan                                                           |
| GP13               | A2BG2     | digalactosylated biantennary glycan with bisecting GlcNAc                                     |
| GP14               | FA2G2     | digalactosylated biantennary glycan with core fucose                                          |
| GP15               | FA2BG2    | digalactosylated biantennary glycan with bisecting GlcNAc and core fucose                     |
| GP16               | FA2G1S1   | monogalactosylated monosialylated biantennary glycan with core fucose                         |
| GP17               | A2G2S1    | digalactosylated monosialylated biantennary glycan                                            |
| GP18               | FA2G2S1   | digalactosylated monosialylated biantennary glycan with core fucose                           |
| GP19               | FA2BG2S1  | digalactosylated monosialylated biantennary glycan with bisecting GlcNAc and core fucose      |
| GP20               | FA2FG2S1  | digalactosylated monosialylated biantennary with core and antennary fucose                    |
| GP21               | A2G2S2    | digalactosylated disialylated biantennary glycan                                              |

|                      |                             |                                                                                            |
|----------------------|-----------------------------|--------------------------------------------------------------------------------------------|
| GP22                 | A2BG2S2                     | digalactosylated disialylated biantennary glycan with bisecting GlcNAc                     |
| GP23                 | FA2G2S2                     | digalactosylated disialylated biantennary glycan with core fucose                          |
| GP24                 | FA2BG2S2                    | digalactosylated disialylated biantennary glycan with bisecting GlcNAc and core fucose     |
| <b>Derived trait</b> |                             |                                                                                            |
| IGP24                | FGS/(FG+FGS)                | sialylation of fucosylated galactosylated structures without bisecting GlcNAc              |
| IGP25                | FBGS/(FBG+FBGS)             | sialylation of fucosylated galactosylated structures with bisecting GlcNAc                 |
| IGP26                | FGS/(F+FG+FGS)              | sialylation of all fucosylated structures without bisecting GlcNAc                         |
| IGP27                | FBGS/(FB+FBG+FBGS)          | sialylation of all fucosylated structures with bisecting GlcNAc                            |
| IGP28                | FG1S1/(FG1+FG1S1)           | Monosialylation of fucosylated monogalactosylated structures                               |
| IGP29                | FG2S1/(FG2+FG2S1+FG2S2)     | monosialylation of fucosylated digalactosylated structures                                 |
| IGP30                | FG2S2/(FG2+FG2S1+FG2S2)     | disialylation of fucosylated digalactosylated structures                                   |
| IGP31                | FBG2S1/(FBG2+FBG2S1+FBG2S2) | monosialylation of fucosylated digalactosylated structures with bisecting GlcNAc           |
| IGP32                | FBG2S2/(FBG2+FBG2S1+FBG2S2) | disialylation of fucosylated digalactosylated structures with bisecting GlcNAc             |
| IGP33                | FtotalS1/FtotalS2           | ratio of all fucosylated (+/- bisecting GlyNAc) monosialylated and disialylated structures |
| IGP34                | FS1/FS2                     | ratio of fucosylated (without bisecting GlcNAc) monosialylated and disialylated structures |
| IGP35                | FBS1/FBS2                   | ratio of fucosylated (with bisecting GlcNAc) monosialylated and disialylated structures    |
| IGP36                | FBStotal/FStotal            | ratio of all fucosylated sialylated structures with and without bisecting GlcNAc           |
| IGP37                | FBS1/FS1                    | ratio of fucosylated monosialylated structures with and without bisecting GlcNAc           |
| IGP38                | FBS1/(FS1+FBS1)             | the incidence of bisecting GlcNAc in all fucosylated monosialylated structures             |
| IGP39                | FBS2/FS2                    | ratio of fucosylated disialylated structures with and without bisecting GlcNAc             |
| IGP40                | FBS2/(FS2+FBS2)             | The incidence of bisecting GlcNAc in all fucosylated disialylated structures               |
| IGP41                | GP1n                        | monoantennary glycan with core fucose structures in total neutral IgG glycans              |

|       |                 |                                                                                                                       |
|-------|-----------------|-----------------------------------------------------------------------------------------------------------------------|
| IGP42 | GP2n            | biantennary glycan structures in total neutral IgG glycans                                                            |
| IGP43 | GP4n            | structure not determined                                                                                              |
| IGP44 | GP5n            | biantennary glycan with core fucose structures in total neutral IgG glycans                                           |
| IGP45 | GP6n            | high mannose glycan structures in total neutral IgG glycans                                                           |
| IGP46 | GP7n            | biantennary glycan with bisecting GlcNAc and core fucose structures in total neutral IgG glycans                      |
| IGP47 | GP8n            | monogalactosylated biantennary glycan structures in total neutral IgG glycans                                         |
| IGP48 | GP9n            | monogalactosylated biantennary glycan with 1-6 linkages structures in total neutral IgG glycans                       |
| IGP49 | GP10n           | monogalactosylated biantennary glycan with 1-3 linkages structures in total neutral IgG glycans                       |
| IGP50 | GP11n           | monogalactosylated biantennary glycan with 1-6 linkages with bisecting GlcNAc structures in total neutral IgG glycans |
| IGP51 | GP12n           | monogalactosylated biantennary glycan with 1-3 linkages with bisecting GlcNAc structures in total neutral IgG glycans |
| IGP52 | GP13n           | digalactosylated biantennary glycan structures in total neutral IgG glycans                                           |
| IGP53 | GP14n           | digalactosylated biantennary glycan with bisecting GlcNAc structures in total neutral IgG glycans                     |
| IGP54 | GP15n           | digalactosylated biantennary glycan with core fucose structures in total neutral IgG glycans                          |
| IGP55 | G0n             | agalactosylated structures in total neutral IgG glycans                                                               |
| IGP56 | G1n             | monogalactosylated structures in total neutral IgG glycans                                                            |
| IGP57 | G2n             | digalactosylated structures in total neutral IgG glycans                                                              |
| IGP58 | Fn total        | all fucosylated (+/- bisecting GlcNAc) structures in total neutral IgG glycans                                        |
| IGP59 | FG0n total/G0n  | fucosylation of agalactosylated structures                                                                            |
| IGP60 | FG1n total/G1n  | fucosylation of monogalactosylated structures                                                                         |
| IGP61 | FG2n total /G2n | fucosylation of digalactosylated structures                                                                           |
| IGP62 | Fn              | fucosylated (without bisecting GlcNAc) structures in total neutral IgG glycans                                        |
| IGP63 | FG0n/G0n        | fucosylation (without bisecting GlcNAc) of agalactosylated structures                                                 |
| IGP64 | FG1n/G1n        | fucosylation (without bisecting GlcNAc) of                                                                            |

|       |                        |                                                                                                                                   |
|-------|------------------------|-----------------------------------------------------------------------------------------------------------------------------------|
|       |                        | monogalactosylated structures                                                                                                     |
| IGP65 | FG2n/G2n               | fucosylation (without bisecting GlcNAc) of digalactosylated structures                                                            |
| IGP66 | FBn                    | fucosylated (with bisecting GlcNAc) structures in total neutral IgG glycans                                                       |
| IGP67 | FBG0n/G0n              | fucosylation (with bisecting GlcNAc) of agalactosylated structures                                                                |
| IGP68 | FBG1n/G1n              | fucosylation (with bisecting GlcNAc) of monogalactosylated structures                                                             |
| IGP69 | FBG2n/G2n              | fucosylation (with bisecting GlcNAc) of digalactosylated structures                                                               |
| IGP70 | FBn/Fn                 | ratio of fucosylated structures with and without bisecting GlcNAc                                                                 |
| IGP71 | FBn/Fn total           | the incidence of bisecting GlcNAc in all fucosylated structures in total neutral IgG glycans                                      |
| IGP72 | Fn/(Bn + FBn)          | ratio of fucosylated non-bisecting GlcNAc structures and all structures with bisecting GlcNAc                                     |
| IGP73 | Bn/(Fn + FBn)          | ratio of structures with bisecting GlcNAc and all fucosylated structures (+/- bisecting GlcNAc)                                   |
| IGP74 | FBG2n/FG2n             | ratio of fucosylated digalactosylated structures with and without bisecting GlcNAc                                                |
| IGP75 | FBG2n / (FG2n + FBG2n) | the incidence of bisecting GlcNAc in all fucosylated digalactosylated structures in total neutral IgG glycans                     |
| IGP76 | FG2n/(BG2n + FBG2n)    | ratio of fucosylated digalactosylated non-bisecting GlcNAc structures and all digalactosylated structures with bisecting GlcNAc   |
| IGP77 | BG2n/(FG2n + FBG2n)    | ratio of digalactosylated structures with bisecting GlcNAc and all fucosylated digalactosylated structures (+/- bisecting GlcNAc) |

**Supplementary Table S2: The associations of all the 78 IgG glycans with type 2 diabetes for the discovery and replication populations.**

Each of the IgG glycan was explored in the univariate logistics models and  $P$ -values $<6.41E-4$  was considered statistically significant.

|      | Discovery population |         |           |       | Replication population |         |           |       |
|------|----------------------|---------|-----------|-------|------------------------|---------|-----------|-------|
|      | $\beta$              | Std err | $P$ value | OR    | $\beta$                | Std err | $P$ value | OR    |
| GP1  | 0.2445               | 0.1172  | 0.037     | 1.277 | 0.6449                 | 0.0886  | <.0001    | 1.906 |
| GP10 | -0.64                | 0.1291  | <.0001    | 0.527 | -0.2179                | 0.0754  | 0.0039    | 0.804 |
| GP11 | -0.7474              | 0.1339  | <.0001    | 0.474 | 0.0263                 | 0.0745  | 0.724     | 1.027 |
| GP12 | -0.3036              | 0.1146  | 0.0081    | 0.738 | -0.5796                | 0.0807  | <.0001    | 0.56  |
| GP13 | -1.5199              | 0.1861  | <.0001    | 0.219 | -2.9699                | 0.2054  | <.0001    | 0.051 |
| GP14 | -0.35                | 0.1177  | 0.0029    | 0.705 | -1.2409                | 0.1065  | <.0001    | 0.289 |
| GP15 | -1.2732              | 0.1648  | <.0001    | 0.28  | -1.8241                | 0.1347  | <.0001    | 0.161 |
| GP16 | -0.1921              | 0.1131  | 0.0895    | 0.825 | -0.1346                | 0.0745  | 0.0707    | 0.874 |
| GP17 | -0.2942              | 0.1147  | 0.0103    | 0.745 | -0.8115                | 0.099   | <.0001    | 0.444 |
| GP18 | -0.4567              | 0.2021  | 0.0238    | 0.633 | -1.4956                | 0.1411  | <.0001    | 0.224 |
| GP19 | 0.4404               | 0.1411  | 0.0018    | 1.553 | 0.7382                 | 0.0956  | <.0001    | 2.092 |
| GP2  | 0.426                | 0.1206  | 0.0004    | 1.531 | 1.3758                 | 0.1126  | <.0001    | 3.958 |
| GP20 | -1.8423              | 0.2091  | <.0001    | 0.158 | -4.0981                | 0.2956  | <.0001    | 0.017 |
| GP21 | 0.0658               | 0.112   | 0.557     | 1.068 | -0.2736                | 0.0758  | 0.0003    | 0.761 |
| GP22 | 0.9243               | 0.1569  | <.0001    | 2.52  | 0.9301                 | 0.0957  | <.0001    | 2.535 |
| GP23 | 0.623                | 0.1271  | <.0001    | 1.864 | -0.0731                | 0.0741  | 0.3235    | 0.929 |
| GP24 | 1.2841               | 0.1732  | <.0001    | 3.611 | 1.2623                 | 0.1152  | <.0001    | 3.533 |
| GP3  | -0.9371              | 0.1747  | <.0001    | 0.392 | -1.046                 | 0.1119  | <.0001    | 0.351 |

|       |         |        |        |       |         |        |        |       |
|-------|---------|--------|--------|-------|---------|--------|--------|-------|
| GP4   | 0.875   | 0.1408 | <.0001 | 2.399 | 1.7972  | 0.1359 | <.0001 | 6.033 |
| GP5   | -2.2468 | 0.2456 | <.0001 | 0.106 | -3.8454 | 0.2872 | <.0001 | 0.021 |
| GP6   | 0.5419  | 0.1238 | <.0001 | 1.719 | 1.7009  | 0.1266 | <.0001 | 5.479 |
| GP7   | -1.4483 | 0.1753 | <.0001 | 0.235 | -1.5589 | 0.1212 | <.0001 | 0.21  |
| GP8   | -0.6294 | 0.1252 | <.0001 | 0.533 | -0.7117 | 0.0863 | <.0001 | 0.491 |
| GP9   | -0.2203 | 0.1136 | 0.0524 | 0.802 | 0.1509  | 0.0759 | 0.0469 | 1.163 |
| IGP24 | 0.0489  | 0.1119 | 0.6619 | 1.05  | -0.3725 | 0.0807 | <.0001 | 0.689 |
| IGP25 | 1.4787  | 0.1832 | <.0001 | 4.387 | 1.3999  | 0.1185 | <.0001 | 4.055 |
| IGP26 | -0.2534 | 0.1177 | 0.0313 | 0.776 | -0.9478 | 0.0993 | <.0001 | 0.388 |
| IGP27 | 0.9513  | 0.1516 | <.0001 | 2.589 | 0.4353  | 0.0819 | <.0001 | 1.545 |
| IGP28 | 0.0711  | 0.1115 | 0.5235 | 1.074 | 0.044   | 0.0747 | 0.5559 | 1.045 |
| IGP29 | -0.3228 | 0.225  | 0.1514 | 0.724 | -0.3402 | 0.1594 | 0.0328 | 0.712 |
| IGP30 | 0.8895  | 0.1421 | <.0001 | 2.434 | 0.7015  | 0.0901 | <.0001 | 2.017 |
| IGP31 | 0.4762  | 0.1317 | 0.0003 | 1.61  | 1.11    | 0.1044 | <.0001 | 3.034 |
| IGP32 | 1.6849  | 0.2095 | <.0001 | 5.392 | 2.1653  | 0.1707 | <.0001 | 8.717 |
| IGP33 | -1.3586 | 0.1752 | <.0001 | 0.257 | -1.5596 | 0.1284 | <.0001 | 0.21  |
| IGP34 | -0.9769 | 0.1601 | <.0001 | 0.376 | -0.6395 | 0.0896 | <.0001 | 0.528 |
| IGP35 | -0.8802 | 0.1629 | <.0001 | 0.415 | -0.7417 | 0.0988 | <.0001 | 0.476 |
| IGP36 | 0.9371  | 0.1759 | <.0001 | 2.553 | 1.8223  | 0.1389 | <.0001 | 6.186 |
| IGP37 | 0.5406  | 0.168  | 0.0013 | 1.717 | 1.3919  | 0.1233 | <.0001 | 4.022 |
| IGP38 | 0.4646  | 0.1353 | 0.0006 | 1.591 | 1.2758  | 0.1129 | <.0001 | 3.582 |
| IGP39 | 0.3247  | 0.1161 | 0.0052 | 1.384 | 1.2731  | 0.1123 | <.0001 | 3.572 |
| IGP40 | 0.3265  | 0.1157 | 0.0048 | 1.386 | 1.1803  | 0.1049 | <.0001 | 3.255 |
| IGP41 | 0.244   | 0.1173 | 0.0374 | 1.276 | 0.5881  | 0.0867 | <.0001 | 1.801 |
| IGP42 | 0.4331  | 0.121  | 0.0003 | 1.542 | 1.3419  | 0.111  | <.0001 | 3.826 |

|       |         |        |        |       |         |        |        |       |
|-------|---------|--------|--------|-------|---------|--------|--------|-------|
| IGP43 | 0.9867  | 0.1469 | <.0001 | 2.682 | 1.8653  | 0.1391 | <.0001 | 6.458 |
| IGP44 | -2.278  | 0.2492 | <.0001 | 0.102 | -4.0163 | 0.3012 | <.0001 | 0.018 |
| IGP45 | 0.5838  | 0.1254 | <.0001 | 1.793 | 1.7349  | 0.128  | <.0001 | 5.668 |
| IGP46 | -1.4599 | 0.1768 | <.0001 | 0.232 | -1.7004 | 0.1288 | <.0001 | 0.183 |
| IGP47 | -0.6734 | 0.1273 | <.0001 | 0.51  | -1.3015 | 0.1086 | <.0001 | 0.272 |
| IGP48 | -0.2482 | 0.1145 | 0.0302 | 0.78  | -0.1088 | 0.0743 | 0.1431 | 0.897 |
| IGP49 | -0.6531 | 0.1309 | <.0001 | 0.52  | -0.4102 | 0.0782 | <.0001 | 0.663 |
| IGP50 | -0.7907 | 0.1373 | <.0001 | 0.454 | -0.1414 | 0.0751 | 0.0597 | 0.868 |
| IGP51 | -0.3014 | 0.1146 | 0.0086 | 0.74  | -0.6439 | 0.0824 | <.0001 | 0.525 |
| IGP52 | -1.4673 | 0.1821 | <.0001 | 0.231 | -2.9846 | 0.2061 | <.0001 | 0.051 |
| IGP53 | -0.3188 | 0.1165 | 0.0062 | 0.727 | -1.2466 | 0.1063 | <.0001 | 0.287 |
| IGP54 | -1.2078 | 0.1605 | <.0001 | 0.299 | -1.8939 | 0.1394 | <.0001 | 0.15  |
| IGP55 | 1.0325  | 0.1502 | <.0001 | 2.808 | 2.1105  | 0.1518 | <.0001 | 8.252 |
| IGP56 | -1.3333 | 0.1671 | <.0001 | 0.264 | -1.6833 | 0.1299 | <.0001 | 0.186 |
| IGP57 | -0.4739 | 0.1223 | 0.0001 | 0.623 | -1.3899 | 0.1127 | <.0001 | 0.249 |
| IGP58 | 0.536   | 0.1307 | <.0001 | 1.709 | 0.5847  | 0.0903 | <.0001 | 1.794 |
| IGP59 | -0.0613 | 0.112  | 0.5843 | 0.941 | -0.5994 | 0.0889 | <.0001 | 0.549 |
| IGP60 | 1.3958  | 0.184  | <.0001 | 4.038 | 1.5153  | 0.1329 | <.0001 | 4.551 |
| IGP61 | 0.3865  | 0.12   | 0.0013 | 1.472 | 0.2703  | 0.0803 | 0.0008 | 1.31  |
| IGP62 | 0.4554  | 0.1197 | 0.0001 | 1.577 | -0.0682 | 0.0741 | 0.358  | 0.934 |
| IGP63 | 0.2765  | 0.1144 | 0.0156 | 1.318 | -0.1862 | 0.0762 | 0.0146 | 0.83  |
| IGP64 | 0.544   | 0.1241 | <.0001 | 1.723 | 0.1715  | 0.0761 | 0.0242 | 1.187 |
| IGP65 | 0.9019  | 0.1435 | <.0001 | 2.464 | 0.565   | 0.0904 | <.0001 | 1.759 |
| IGP66 | -0.3296 | 0.1166 | 0.0047 | 0.719 | 0.2526  | 0.0765 | 0.001  | 1.287 |
| IGP67 | -0.3191 | 0.1158 | 0.0058 | 0.727 | 0.0237  | 0.0745 | 0.7509 | 1.024 |

|       |         |        |        |       |         |        |        |       |
|-------|---------|--------|--------|-------|---------|--------|--------|-------|
| IGP68 | -0.3568 | 0.1179 | 0.0025 | 0.7   | 0.0109  | 0.0745 | 0.8836 | 1.011 |
| IGP69 | -1.0485 | 0.155  | <.0001 | 0.35  | -0.7208 | 0.0871 | <.0001 | 0.486 |
| IGP70 | -0.356  | 0.1171 | 0.0024 | 0.7   | 0.2216  | 0.0759 | 0.0035 | 1.248 |
| IGP71 | -0.3573 | 0.1173 | 0.0023 | 0.7   | 0.2138  | 0.076  | 0.0049 | 1.238 |
| IGP72 | 0.4142  | 0.119  | 0.0005 | 1.513 | -0.1159 | 0.0748 | 0.1213 | 0.891 |
| IGP73 | -1.4643 | 0.1818 | <.0001 | 0.231 | -2.9697 | 0.2054 | <.0001 | 0.051 |
| IGP74 | -1.0613 | 0.1545 | <.0001 | 0.346 | -0.7288 | 0.0879 | <.0001 | 0.483 |
| IGP75 | -1.0653 | 0.1552 | <.0001 | 0.345 | -0.7376 | 0.0873 | <.0001 | 0.478 |
| IGP76 | 1.2463  | 0.1656 | <.0001 | 3.477 | 1.0149  | 0.0976 | <.0001 | 2.759 |
| IGP77 | -1.3632 | 0.1786 | <.0001 | 0.256 | -2.0073 | 0.1567 | <.0001 | 0.134 |

---
